# Supplementary material
Source: PubMed Central journal article supplement (PMC4124129)
Supplement: NIHMS608062-supplement-Supporting_Information.pdf [file NIHMS608062-supplement-Supporting_Information.pdf]

## Supporting Information

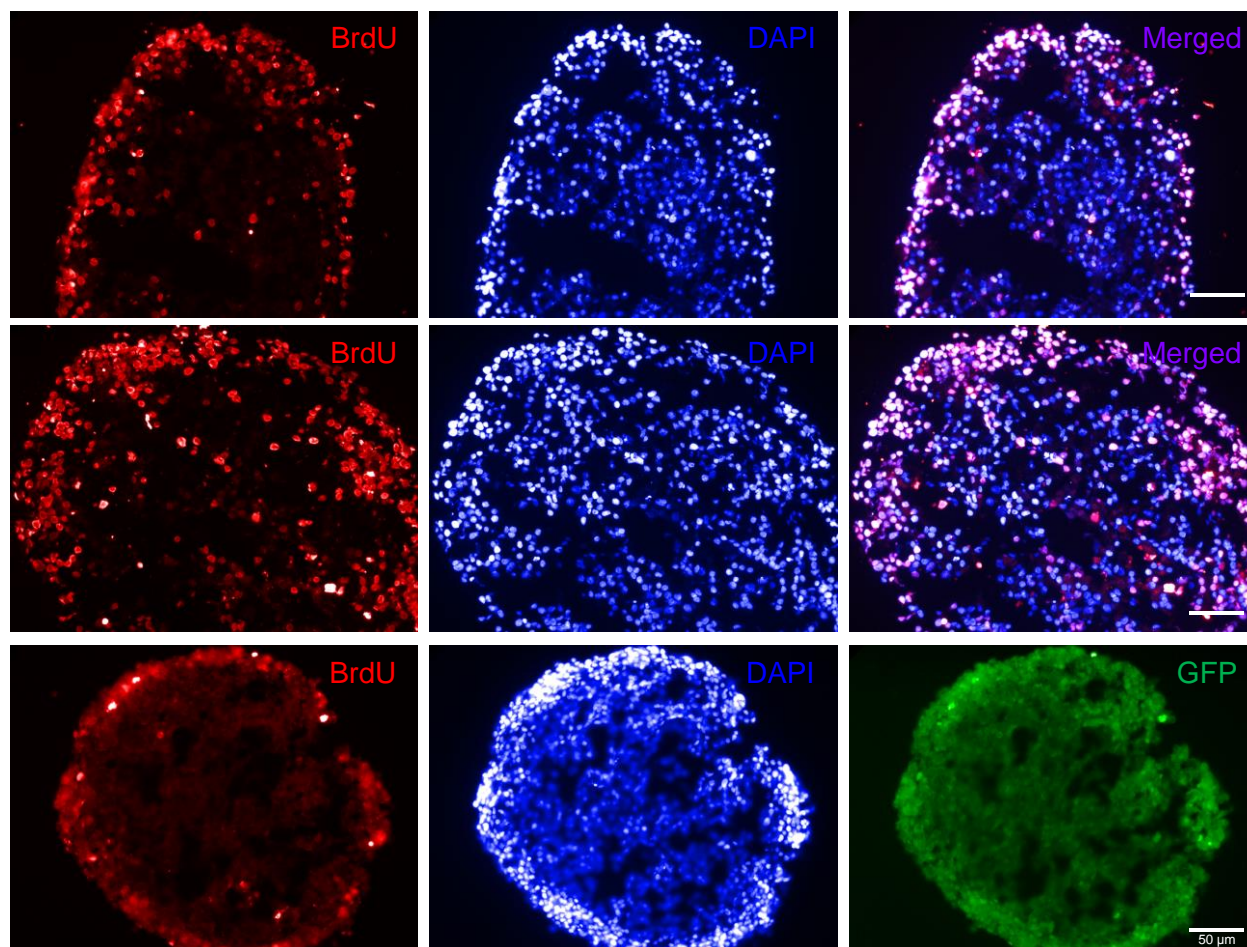

**Supplementary Figure 1.** Representative images from cryosectioned NS-AHPCs immunostained for BrdU incorporation. Red (Cy3), BrdU-immunoreactive cells; Blue, DAPI nuclear counter-stained cells; Purple, both colorized images for BrdU- and DAPI-positive cells merged; Green, GFP-expressing AHPCs. Scale bars, 50  $\mu\text{m}$ .
